# Supplementary material
Source: Springer Nature journal article supplement (https://www.springermedizin.de/resource/supplementary/12903_2014_483_MOESM9_ESM.pdf/9516790)

A

Buccal

 $P < 0.01$ 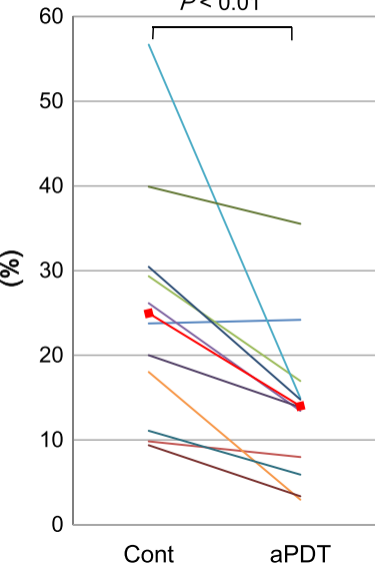

B

Lingual

 $P < 0.01$ 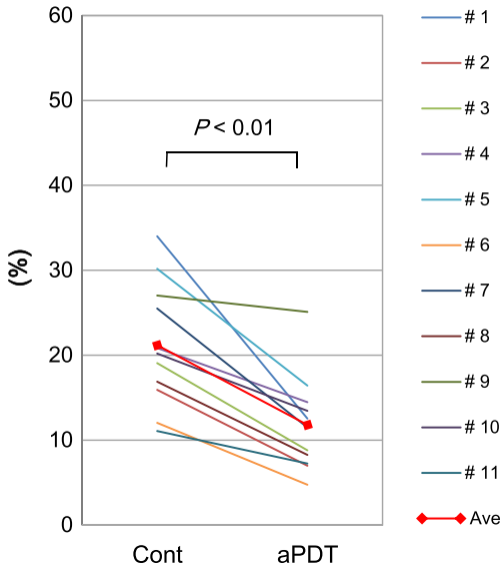

Supplement: MOESM9 [file 9516790]
